# Supplementary material for: The Multi-kinase Inhibitor Debio 0617B Reduces Maintenance and Self-renewal of Primary Human AML CD34+ Stem/Progenitor Cells
Source: Oxford University Press journal article supplement (doi:10.1158/1535-7163.mct-16-0889), 2017-05-03
Supplement: 15357163mct160889-sup-176402_3_unknown_upload_3992492_22p207.pdf [file 15357163mct160889-sup-176402_3_unknown_upload_3992492_22p207.pdf]

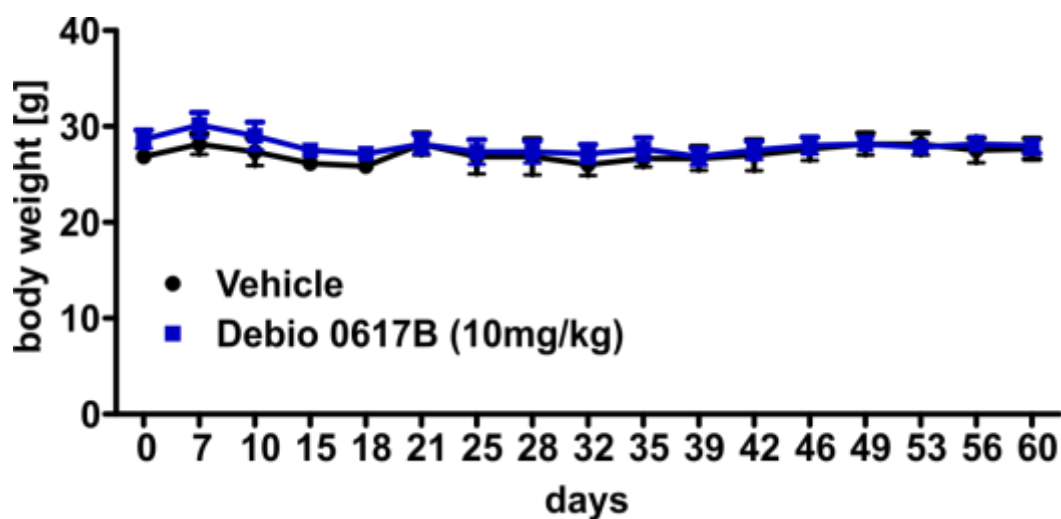

**Figure S6: Body weight of naïve mice is not affected by Debio 0617B.** Naïve BL/6 mice (n=10 mice/group) were treated with vehicle or Debio 0617B (10 mg/kg) on a “5 days on 2 days off” regimen for 60 days and body weight was monitored. Data are shown as mean±s.e.m. Statistics: two-way ANOVA. Statistically not significant differences with  $P>0.05$  are not indicated. Related to Figure 3.
